# Supplementary material for: Interleukin-6 Is a Circulating Prognostic Biomarker for Hepatocellular Carcinoma Patients Treated with Combined Immunotherapy
Source: MDPI journal article supplement (doi:10.3390/cancers14040883), 2022-02-10
Supplement: s1 [file s1]

# Supplementary Figure S1

**A**

Best Response (mRECIST)

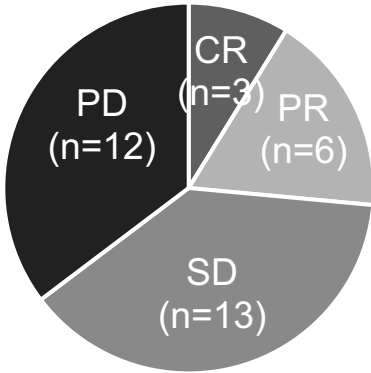

**B**

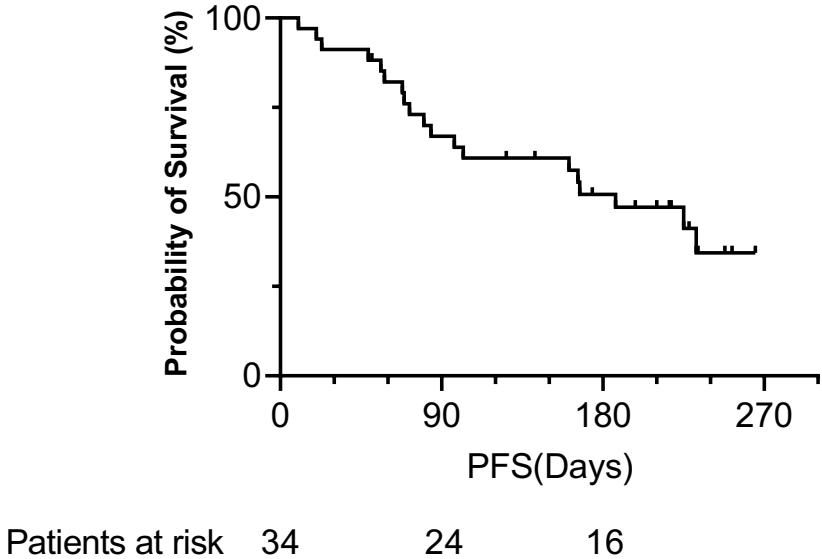

**C**

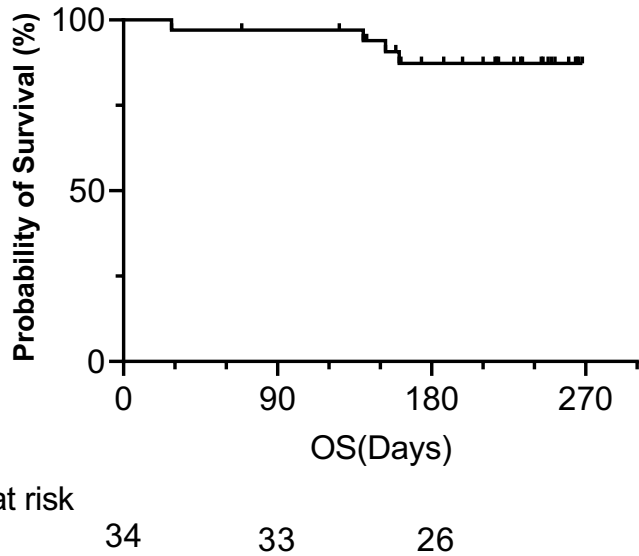

**Figure S1.** A total of 34 HCC patients were treated with Atezo/Bev therapy. **(A)** The initial response to Atezo/Bev was evaluated by mRECIST. **(B, C)** Kaplan–Meier curves of progression-free survival (PFS) **(B)** and overall survival (OS) **(C)**. Atezo/Bev; Atezolizumab and bevacizumab, CR; complete response, PR; partial response, SD; stable disease, PD; progressing disease.

# Supplementary Figure S2

**A**

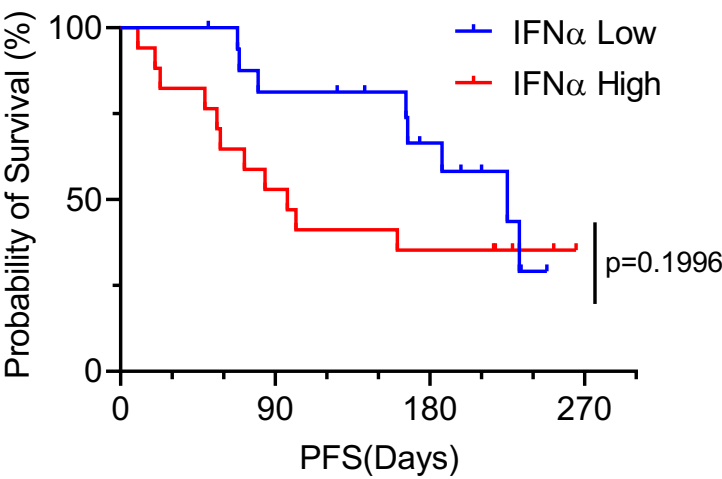

Patients at risk

|           |    |    |   |
|-----------|----|----|---|
| IFNα Low  | 17 | 14 | 9 |
| IFNα High | 17 | 10 | 7 |

**B**

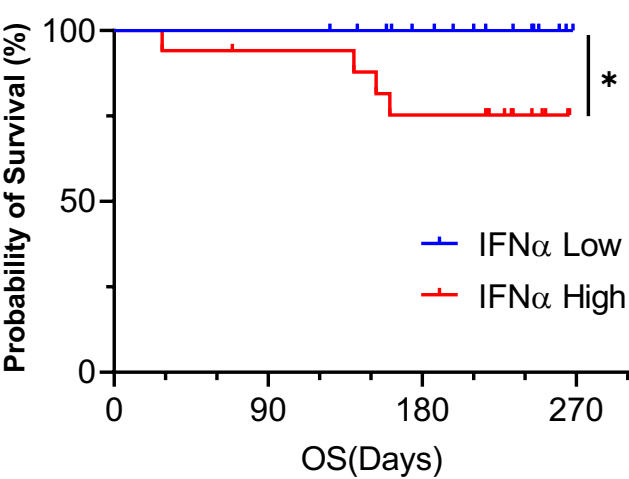

Patients at risk

|           |    |    |    |
|-----------|----|----|----|
| IFNα Low  | 17 | 17 | 13 |
| IFNα High | 17 | 16 | 13 |

**Figure S2. (A, B)** The Kaplan–Meier curves for the progression-free survival (PFS) **(A)** and overall survival (OS) **(B)** . The patients were divided into 2 groups by the median value of plasma IFNα. \*:p<0.05.

# Supplementary Figure S3

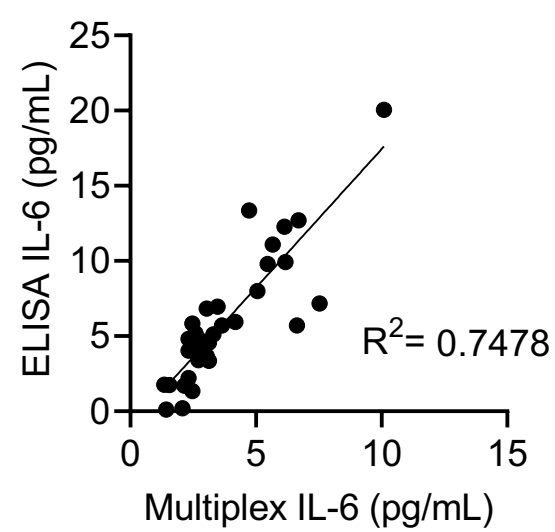

**Figure S3.** The pretreatment plasma IL-6 level of 34 HCC patients was examined with ELISA and Luminex assay. Their correlation was analyzed with simple linear regression.

**Table S1. Patient characteristics(N=34).**

| Characteristic             | Unit                      | Value (Median, IQR) |
|----------------------------|---------------------------|---------------------|
| Age                        | Years                     | 73 (61-79)          |
| Sex                        | Male/Female               | 26/8                |
| Etiology                   | HBV/HCV/NBNC              | 11/10/13            |
| Platelets                  | $\times 10^4/\mu\text{L}$ | 12.3 (8.9-14.9)     |
| Total Bilirubin            | mg/dL                     | 0.85 (0.6-1.1)      |
| AST                        | U/L                       | 41 (27-53)          |
| ALT                        | U/L                       | 29 (19-37)          |
| PT                         | %                         | 92 (84-101)         |
| Albumin                    | g/dL                      | 3.6 (3.3-3.9)       |
| Child-Pugh Score           | 5/6/7                     | 16/16/2             |
| AFP                        | ng/mL                     | 32 (5.5-251)        |
| DCP                        | mAU/mL                    | 237 (48-4529)       |
| Distant Metastasis         | Present/Absent            | 15/19               |
| Vascular Invasion          | Present/Absent            | 4/30                |
| BCLC Stage                 | A/B/C                     | 1/15/18             |
| Observation Time           | Days                      | 106 (61-147)        |
| Tratment Line              | 1st/2nd                   | 22/12               |
| Initial Response (mRECIST) | CR/PR/SD/PD               | 1/6/15/12           |
| Best Response (mRECIST)    | CR/PR/SD/PD               | 3/6/13/12           |

Abbreviations: AST, aspartate transaminase; ALT, alanine aminotransferase; PT, prothrombin time  
 AFP, alpha-fetoprotein; BCLC, Barcelona clinic liver cancer; DCP, des- $\gamma$ -carboxy prothrombin  
 mRECIST:Modified Response Evaluation Criteria in Solid Tumors

**Table S2. Correlation between each plasma protein and AFP level.**

| Proteins     | R squared | FDR adjusted<br>P value |
|--------------|-----------|-------------------------|
| GDF15        | 0.82      | <0.0001                 |
| CCL19        | 0.73      | <0.0001                 |
| GranzymeB    | 0.68      | <0.0001                 |
| HGF          | 0.46      | 0.001                   |
| IL18         | 0.26      | 0.026                   |
| CX3CL1       | 0.25      | 0.030                   |
| TSP2         | 0.22      | 0.036                   |
| CXCL1        | 0.22      | 0.036                   |
| IFN $\gamma$ | 0.18      | 0.090                   |
| DDK1         | 0.17      | 0.094                   |
| IL8          | 0.14      | 0.153                   |
| TNF $\alpha$ | 0.14      | 0.165                   |
| TIE2         | 0.13      | 0.181                   |
| MICA         | 0.12      | 0.182                   |
| IL6          | 0.08      | 0.341                   |
| CCL7         | 0.07      | 0.405                   |
| IFN $\alpha$ | 0.05      | 0.496                   |
| Fas ligand   | 0.05      | 0.530                   |
| IL4          | 0.04      | 0.546                   |
| CXCL10       | 0.02      | 0.722                   |
| PD-L1        | 0.02      | 0.762                   |
| Fas receptor | 0.02      | 0.762                   |
| CCL3         | 0.01      | 0.805                   |
| VEGF         | 0.01      | 0.805                   |
| IL5          | 0.01      | 0.805                   |
| IL12         | 0.01      | 0.821                   |
| VEGF-C       | 0.00      | 0.871                   |
| IL10         | 0.00      | 0.912                   |
| CCL4         | 0.00      | 0.911                   |
| IL1b         | 0.00      | 0.911                   |
| IL7          | 0.00      | 0.911                   |
| IL2          | 0.00      | 0.922                   |
| CCL2         | 0.00      | 0.923                   |
| CXCL2        | 0.00      | 0.991                   |

**Table S3. Comparison of patient characteristics (Median, IQR).**

| Characteristic           | Unit                      | Cohort for multiplex bead-based immunoassay(N=34) | Cohort for ELISA(N=64) | p value |
|--------------------------|---------------------------|---------------------------------------------------|------------------------|---------|
| Age                      | Years                     | 73 (61-79)                                        | 75 (63-79)             | 0.811   |
| Sex                      | Male/Female               | 26/8                                              | 50/14                  | 0.852   |
| Etiology                 | HBV/HCV/NBNC              | 11/10/13                                          | 15/24/25               | 0.705   |
| Platelets                | $\times 10^4/\mu\text{L}$ | 12.3 (8.9-14.9)                                   | 13.8 (11.1-16.1)       | 0.361   |
| Total Bilirubin          | mg/dL                     | 0.85 (0.6-1.1)                                    | 0.7 (0.5-1.0)          | 0.239   |
| AST                      | U/L                       | 41 (27-53)                                        | 37 (24-52)             | 0.455   |
| ALT                      | U/L                       | 29 (19-37)                                        | 26 (17-35)             | 0.604   |
| PT                       | %                         | 92 (84-101)                                       | 93 (82-102)            | 0.898   |
| Albumin                  | g/dL                      | 3.6 (3.3-3.9)                                     | 3.7 (3.3-4.0)          | 0.629   |
| Child-Pugh Score         | 5/6/7                     | 16/16/2                                           | 34/26/4                | 0.828   |
| AFP                      | ng/mL                     | 32 (5.5-251)                                      | 11 (3.2-200)           | 0.573   |
| DCP                      | mAU/mL                    | 237 (48-4529)                                     | 276 (53-1544)          | 0.945   |
| Distant Metastasis       | Present/Absent            | 15/19                                             | 31/33                  | 0.683   |
| Vascular Invasion        | Present/Absent            | 4/30                                              | 7/57                   | 0.902   |
| BCLC Stage               | A/B/C                     | 1/15/18                                           | 5/25/34                | 0.101   |
| Treatment Line           | 1st/2nd/3rd-              | 22/12                                             | 36/17/11               | 0.015   |
| Initial Response mRECIST | CR/PR/SD/PD               | 1/6/15/12                                         | 1/16/19/26             | 0.798   |

Abbreviations: AST, aspartate transaminase; ALT, alanine aminotransferase; PT, prothrombin time

AFP, alpha-fetoprotein; BCLC, Barcelona clinic liver cancer; DCP, des- $\gamma$ -carboxy prothrombin

mRECIST:Modified Response Evaluation Criteria in Solid Tumors

**Table S4. Cox Hazard Analysis for progressing disease.**

| Characteristic     | Unit                        | Univariate Analysis |               |         | Multivariate Analysis |             |         |
|--------------------|-----------------------------|---------------------|---------------|---------|-----------------------|-------------|---------|
|                    |                             | Hazard ratio        | 95% CI        | p value | Hazard ratio          | 95% CI      | p value |
| Age                | every 1 y.o.                | 0.964               | 0.935-0.993   | 0.016   | 0.954                 | 0.920-0.989 | 0.012   |
| Sex                | Male/Female                 | 1.284               | 0.571-2.887   | 0.545   |                       |             |         |
| Etiology           | Viral/Non-viral             | 1.028               | 0.516-2.048   | 0.938   |                       |             |         |
| Platelets          | every 1×10 <sup>4</sup> /μL | 0.999               | 0.949-1.042   | 0.990   |                       |             |         |
| Total Bilirubin    | every 1mg/dL                | 0.796               | 0.280-2.032   | 0.650   |                       |             |         |
| AST                | every 1U/L                  | 1.006               | 0.993-1.017   | 0.316   |                       |             |         |
| ALT                | every 1U/L                  | 1.002               | 0.985-1.018   | 0.752   |                       |             |         |
| PT                 | every 1%                    | 1.016               | 1.043-0.985   | 0.247   |                       |             |         |
| Albumin            | every 1g/dL                 | 1.149               | 0.607-2.221   | 0.674   |                       |             |         |
| Child-Pugh Score   | 6, 7 / 5                    | 0.76                | 0.386-1.497   | 0.428   |                       |             |         |
| AFP                | every 1ng/mL                | 1                   | 0.999-1.000   | 0.292   |                       |             |         |
| DCP                | every 1mAU/mL               | 1                   | 1.000-1.00004 | 0.015   | 1                     | 0.999-1.000 | 0.105   |
| Distant Metastasis | Present/Absent              | 1.349               | 0.693-2.627   | 0.378   |                       |             |         |
| Vascular Invasion  | Present/Absent              | 1.924               | 0.792-4.67    | 0.148   |                       |             |         |
| BCLC Stage         | C / A,B                     | 1.241               | 0.636-2.426   | 0.526   |                       |             |         |
| Treatment Line     | 1st / later                 | 0.445               | 0.227-0.873   | 0.019   | 0.652                 | 0.711-3.30  | 0.273   |
| IL6                | every 1 pg/ml               | 1.052               | 1.011-1.088   | 0.016   | 1.051                 | 1.007-1.091 | 0.012   |

Abbreviations: AST, aspartate transaminase; ALT, alanine aminotransferase

PT, prothrombin time; AFP, alpha-fetoprotein; DCP, des-γ-carboxy prothrombin

BCLC, Barcelona clinic liver cancer
